# Supplementary material
Source: Research Square preprint supplement (doi:10.21203/rs.3.rs-8985940/v1)
Supplement: Supplementary file 1 [file 0d2b8c61f1b75743ff2d0908.pdf]

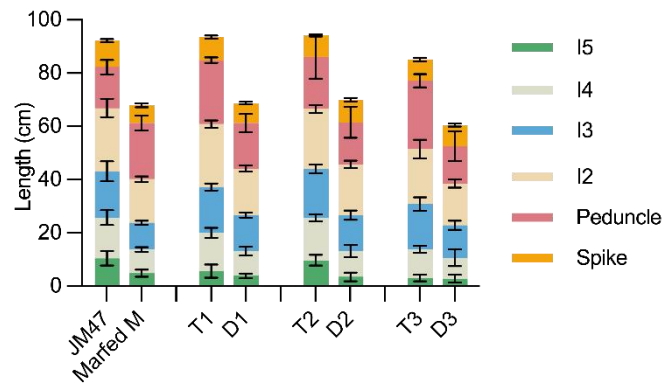

**Fig S1** Statistical analysis of internode lengths of *Rht5* RILs

Internodes from bottom to top were designated sequentially as the fifth, fourth, third, and second internodes (I5, I4, I3, and I2), followed by the peduncle (the uppermost internode directly below the spike) and spike. Data are presented as means  $\pm$  SD ( $n = 8$ ).

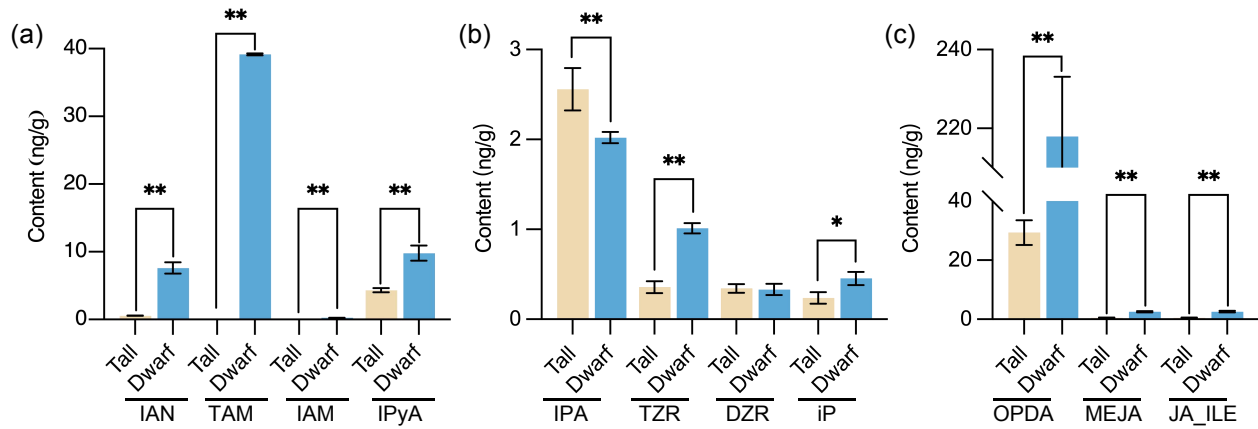

**Fig S2** Measurement of endogenous phytohormone precursors in *Rht5* RILs

(a–c) Contents of endogenous auxin precursors (a), cytokinin precursors (b) and jasmonic acid precursors (c) in *Rht5* RILs.

Data are presented as means  $\pm$  SD ( $n = 3$ ). \* $P < 0.05$ , \*\* $P < 0.01$ , ns, not significant. Student's  $t$  test.

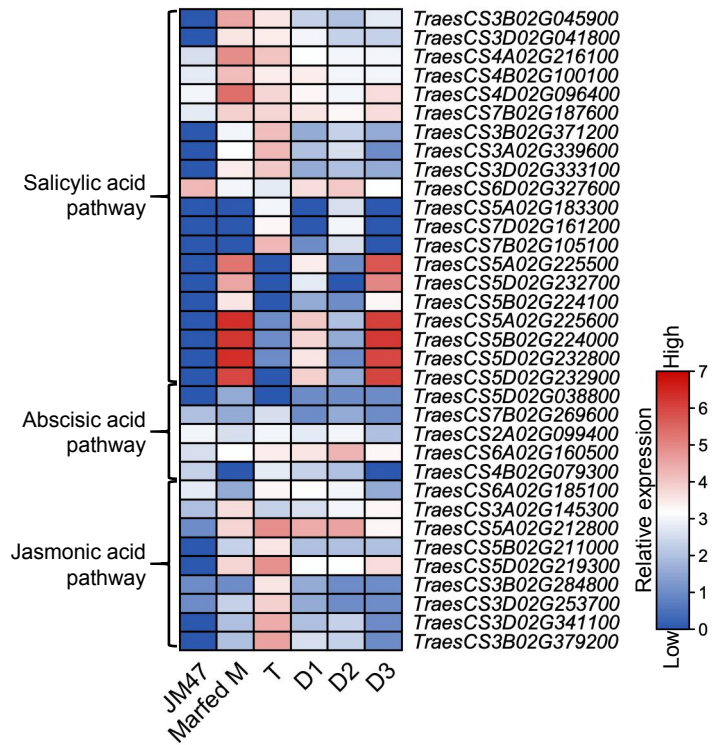

**Fig S3** Heatmap showing TPM values of stress-related phytohormone pathways. TPM (transcripts per million) values of DEGs were used for heatmap analysis. T indicates the tall *Rht5* RILs. D1, D2 and D3 indicates three independent dwarf RILs.

Glutamate decarboxylase (16 – 445 AAs)

|        |                                                                                                                      |     |
|--------|----------------------------------------------------------------------------------------------------------------------|-----|
| TaGAD2 | MVVTVAATG - SDTAEPLHSTTFASRYVRDQLPRYRMPEGSIPKEAAYQIISDELMLDGNP                                                       | 59  |
| GmGAD5 | MVLTSTATHPDEKDDSLNS - TFASRYVRDPIPKFKMPEKSI PKDAAFQIINDELMLDGA                                                       | 59  |
| OsGAD1 | MVLSHASSG - RDDAV - - RCTFAITRYACETLPRFRMPEQSIPKEAAYQIINDELMLDGNP                                                    | 56  |
| ZmGAD1 | MALSTTNTN - - AAESQLHCS - TFASRYVRTALPRFKIPEQSIPKEAAYQIINDELMLDGNP                                                   | 58  |
| AtGAD1 | MVLSHAVS - - ESDVSVHS - TFASRYVRTSLPRFKMPENSI PKEAAYQIINDELMLDGNP                                                    | 56  |
| TaGAD2 | RLNLA SFVTTWMEPECGKLI MDSV NKNYVDMDEYPTTELQNRVCNMIAHLFNAP I G E D E                                                  | 119 |
| GmGAD5 | RLNLA SFVTTWMEPECDKLI M A S L NKNYVDMDEYPTTELQNRVCN I I A N L F H A P I S E E E                                      | 119 |
| OsGAD1 | RLNLA SFVTTWMEPECDKLI M D S V NKNYVDMDEYPTTELQNRVCNMIAHLFNAP I K E D E                                               | 116 |
| ZmGAD1 | RLNLA SFVTTWMEPECDKLI Q S S I NKNYVDMDEYPTTELQNRVCNMIAHLFNAP I G D D E                                               | 118 |
| AtGAD1 | RLNLA SFVTTWMEPECDKLI M S S I NKNYVDMDEYPTTELQNRVCNMIAHLFNAP L E A E                                                 | 116 |
| TaGAD2 | TAIGVSTVGSSEA IMLAGLAFKRKWKANKMK EQGKPCDKPNI VTGANVQVCWEKFARYFEV                                                     | 179 |
| GmGAD5 | TAVGVGTVGSSEA IMLAGLAFKRKWKTRKRK AEGKPYDKPNI VTGANVQVCWEKFARYFEV                                                     | 179 |
| OsGAD1 | TAIGVGTVGSSEA IMLAGLAFKRKWKQNKRK EQGKPCDKPNI VTGANVQVCWEKFARYFEV                                                     | 176 |
| ZmGAD1 | TAVGVGTVGSSEA IMLAGLAFKRKWKQNKMK AAGKPYDKPNI VTGANVQVCWEKFARYFEV                                                     | 178 |
| AtGAD1 | TAVGVGTVGSSEA IMLAGLAFKRKWKQNKRK AEGKPVDKPNI VTGANVQVCWEKFARYFEV                                                     | 176 |
| TaGAD2 | ELKEVKL TEGYYVMDPKKAI EMVDENTICVAAI LGSTL TGEYEDVKLLN D L L V E K N K K T G                                          | 239 |
| GmGAD5 | ELKEVKL KEGYYVMDPAKAV EMVDENTICVAAI LGSTL M T G E F E D V K L L N E L L T E K N K E T G                              | 239 |
| OsGAD1 | ELKEVKL S E G Y Y V M D P V K A V E M V D E N T I C V A A I L G S T L T G E F E D V K L L N L L T E K N K E T G      | 236 |
| ZmGAD1 | ELKEVKL KEGYYVMDPEKA AEMVDENTICVAAI LGSTL N G E F E D V K L L S D L L T A K N A E T G                                | 238 |
| AtGAD1 | ELKEVKL S E G Y Y V M D P Q Q A V D M V D E N T I C V A A I L G S T L N G E F E D V K L L N D L L V E K N K E T G    | 236 |
| TaGAD2 | WNVPIHVDAASGGFIAPFLQPELEWDFRLPLVKSINVS GHKYGLVYPGVGWVIWR SKDDL                                                       | 299 |
| GmGAD5 | WDTP IHVDAASGGFIAPFLY P D L E W D F R L P L V K S I N V S G H K Y G L V Y P G V G W V I W R S K D D L                | 299 |
| OsGAD1 | WDVP IHVDAASGGFIAPFLYPELEWDFRLPLVKSINVS GHKYGLVYPGVGWVIWR SKEDL                                                      | 296 |
| ZmGAD1 | WDTP IHVDAASGGFIAPFLYPELEWDFRLPLVKSINVS GHKYGLVYAGVGVVIWR SKEDL                                                      | 298 |
| AtGAD1 | WDTP IHVDAASGGFIAPFLYPELEWDFRLPLVKSINVS GHKYGLVYAGTGWVIWR N K E D L                                                  | 296 |
| TaGAD2 | PDELIFHINYLGT DQPTFTLNF SKGASQIIAQYYQLIRLGFEGYKHI M E N C K L N A A V L K E                                          | 359 |
| GmGAD5 | PDEL V F H I N Y L G S D Q P T F T L N F S K G S S Q I I A Q Y Y Q L I R L G F E G Y K N I M E N C L E N A R V L K E | 359 |
| OsGAD1 | PEELIFHINYLGT DQPTFTLNF SKGSSQIIAQYYQLIRLGFEGYKNI M Q N C M E N T A I L R E                                          | 356 |
| ZmGAD1 | PDELIFHINYLGA DQPTFTLNF SKGSSQIIAQYYQLIRLGFEGYKDV M Q N C R D N A A V L R E                                          | 358 |
| AtGAD1 | PEELIFHINYLGA DQPTFTLNF SKGSSQVI AQYYQLIRLGH EGYRNV M E N C R E N M I V L R E                                        | 356 |
| TaGAD2 | GIDATGRFDVLSKADGVPLVAIRLKDSTNFSVFDI ISENLRFRFGWIVPAYTMPADA EHVAV                                                     | 419 |
| GmGAD5 | GIER TGRFNII SKDIGVPLVAFSLKDS SQH TVFEI ADHLRKF G W I V P A Y T M P P D A Q H I A V                                  | 419 |
| OsGAD1 | GIEATGRFEILSK EAGVPLVAFSLKDSGRY TVFDI ISELRFRFGWIVPAYTMPANA EHVAV                                                    | 416 |
| ZmGAD1 | GINKMGYFDVLSKDSGVPLVAFSLKDS SKY TVFEVAESLRFRFGWIVPAYTMPADA EHVAV                                                     | 418 |
| AtGAD1 | GLEKTE R F N I V S K D E G V P L V A F S L K D S S C H T E F E I I S D M L R R Y G W I V P A Y T M P P N A Q H I T V | 416 |
| TaGAD2 | LRVVIREDFNRSLAQRL LADINKIVRELD AHAVHAIKLS - - NAAAAEG - - - - - ASKS                                                 | 469 |
| GmGAD5 | LRVVIREDFSRGLAERLAADI EKVVKLLD TLPSPLTTKVAHI TAITSETS - - - - - EKVKKS                                               | 474 |
| OsGAD1 | LRVVIREDFSRSLAERLVS DIVKILH ELD AHS A Q V L K I S - - - S A I A K Q Q S G D D G V V T K K S                          | 473 |
| ZmGAD1 | MRVVIREDFSRGLAERL IADLGK T M A D M D A H A G R - - - - - K Q A P E Q P - - - - - K K S                               | 462 |
| AtGAD1 | LRVVIREDFSRTL AERLVI D I E K V M R E L D E L P S R V I H K I S L G Q E K S E S N S D N L M V T V K K S               | 476 |
| TaGAD2 | TVDAVTEAFK - - - GLAGN - - - KKA GVC                                                                                 | 490 |
| GmGAD5 | AIETQKEI ALYW KRLVDG - - - KRLGAC                                                                                    | 498 |
| OsGAD1 | VLETERE I FAYWRDQVKK - - - KQTGIC                                                                                    | 497 |
| ZmGAD1 | VHDIEK E V T T F W R R L V A N S K K K S M V C                                                                       | 489 |
| AtGAD1 | DIDKQRDIITGW KKFVAD - RKKTS GIC                                                                                      | 502 |

C-terminal auto-inhibitory domain (AID) (460 – 490 AAs)

**Fig S4** Multiple sequence alignment of glutamate decarboxylase (GAD) proteins across plant species

Conserved functional motif of GAD are highlighted in red, and the C-terminal auto-inhibitory domain (AID) is highlighted in green. Ta = *Triticum aestivum* L., Gm = *Glycine max*, Os = *Oryza sativa*, Zm = *Zea mays* and At = *Arabidopsis thaliana*.

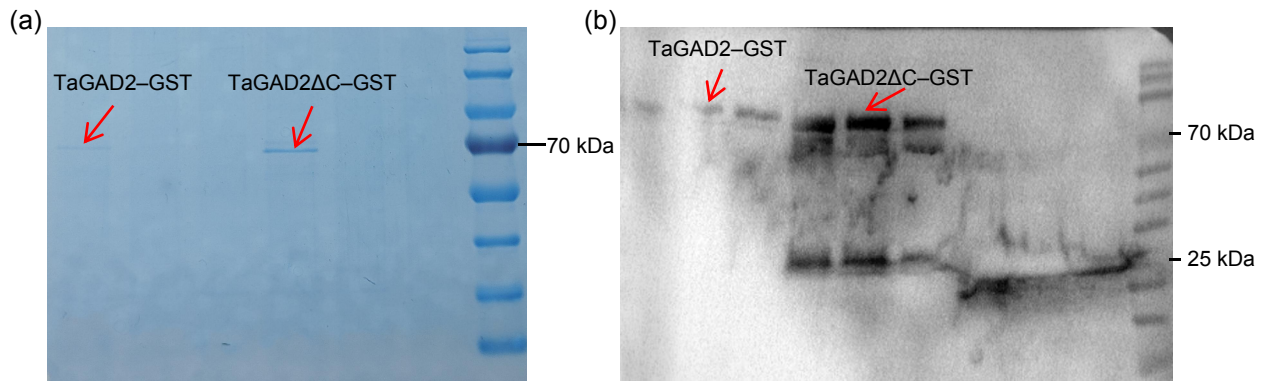

**Fig S5** Prokaryotic expression analysis of TaGAD2 and TaGAD2 $\Delta$ C recombinant proteins (a) Coomassie brilliant blue staining of purified GST-TaGAD2 (full-length) and GST-TaGAD2 $\Delta$ C (C-terminal truncated TaGAD2) from *Escherichia coli* (BL21). The molecular weight of TaGAD2 and TaGAD2 $\Delta$ C are 54.05 kDa and 50.9 kDa, respectively. (b) Western blot analysis of GST-TaGAD2 and GST-TaGAD2 $\Delta$ C with anti-GST monoclonal antibody at a dilution of 1:5000.

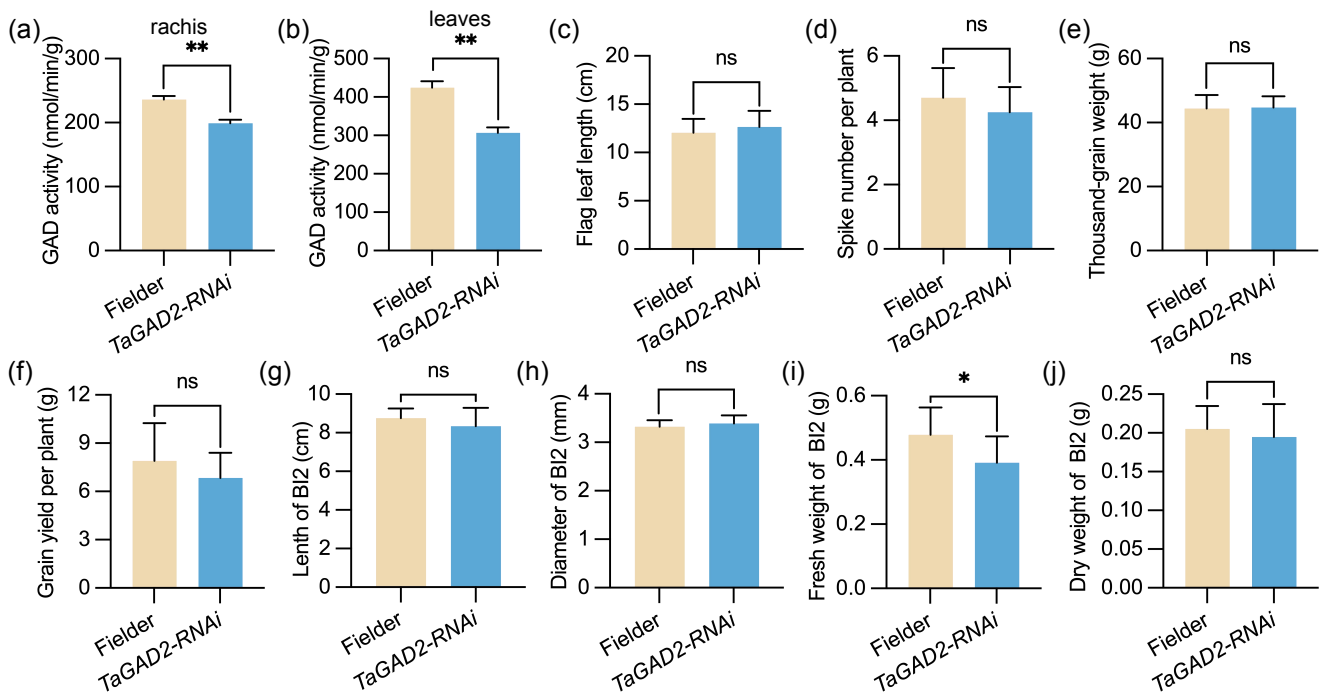

**Fig S6** Effects of *TaGAD2* silencing on agronomic traits in wheat

(a–b) Comparison of GAD activity in rachis (a) and leaves (b) of Fielder and *TaGAD2-RNAi* plants. (c–f) Comparison of flag leaf length (c), spike number per plant (d), thousand-grain weight (e) and grain yield per plant (f) in Fielder and *TaGAD2-RNAi* plants. (g–j) Comparison of the length of BI2 (g), diameter of BI2 (h), fresh weight of BI2 (i) and dry weight of BI2 (j) in Fielder and *TaGAD2-RNAi* plants. Data are presented as means  $\pm$  SD. (a–b,  $n = 3$ . c–f,  $n = 20$ . g–j,  $n = 10$ ). \* $P < 0.05$ , \*\* $P < 0.01$ , ns, not significant. Student's *t* test.
