# Supplementary material
Source: Research Square preprint supplement (doi:10.21203/rs.3.rs-8985940/v1)
Supplement: Supplementary file 2 [file 15eb143df4fdc9309e810b8f.pdf]

**Table S1. Primers for plasmid construction**

| Primer name              | Sequence (5'–3')                                           | Purpose                                                                                  |
|--------------------------|------------------------------------------------------------|------------------------------------------------------------------------------------------|
| GST-TaGAD2-F             | GGGACTCTTGACCATGGTAATGGTGATCTCGCACGCGAGC                   | Constructing the <i>pGEX-4T-GST-TaGAD2</i> plasmid                                       |
| GST-TaGAD2-R             | TCAGTCACGATGCGGCCGCGCAGACTCCGGCCTTCTT                      | Constructing the <i>pGEX-4T-GST-TaGAD2</i> plasmid                                       |
| GST-TaGAD2 $\Delta$ C-R  | TCAGTCACGATGCGGCCGCGGCCGCGGCGTTGGACA                       | Constructing the <i>pGEX-4T-GST-TaGAD2<math>\Delta</math>C</i> plasmid                   |
| 1302-TaGAD2-F            | GGGACTCTTGACCATGGTAATGGTGATCTCGCACGCG                      | Constructing the <i>35S<sub>pro</sub>:TaGAD2-GFP</i> plasmid                             |
| 1302-TaGAD2-R            | GCTCACCATCCTAGGACTAGTGCAGACTCCGGCCTTCTT                    | Constructing the <i>35S<sub>pro</sub>:TaGAD2-GFP</i> plasmid                             |
| 1302-TaGAD2 $\Delta$ C-R | CTCACCATCCTAGGACTAGTGGCGGCCGCGTTGGACA                      | Constructing the <i>35S<sub>pro</sub>:TaGAD2<math>\Delta</math>C-GFP</i> plasmid         |
| CUB-TaGAD2-F             | GAAAAAGAGGGGGATTAAGTATGGTGATCTCGCACGCG                     | Constructing the <i>pCUB-TaGAD2-3<math>\times</math>Flag</i> plasmid                     |
| CUB-TaGAD2-R             | ACCGTACCACCGCTACCGAGCTCGCAGACTCCGGCCTTCTT                  | Constructing the <i>pCUB-TaGAD2-3<math>\times</math>Flag</i> plasmid                     |
| CUB-TaGAD2 $\Delta$ C-R  | ACCGTACCACCGCTACCGAGCTCGGCCGCGCGTTGGACAG                   | Constructing the <i>pCUB-TaGAD2<math>\Delta</math>C-3<math>\times</math>Flag</i> plasmid |
| TaGAD2-Sen-F             | CTTGTTCTTTGAAAAAGAGGGGGATTAggatccGTAAACATGATAGCTCACTTGTTTC |                                                                                          |
| TaGAD2-Sen-R             | GACGCGAAGCGGGTAGATATCactagtGCAAACCTGAACATTTGCACC           | Constructing the <i>pCUB-TaGAD2<math>\Delta</math>C-RNAi</i> plasmid                     |
| TaGAD2-Ant-F             | GATCGAATTCCTGCAGcccgggGCAAACCTGAACATTTGCACC                |                                                                                          |
| TaGAD2-Ant-R             | TGAACGATCGGGGAAATTCgagctcGTAAACATGATAGCTCACTTGTTTC         |                                                                                          |

**Table S2. Primers used in qRT-PCR**

| <b>Primer name</b> | <b>Sequence (5'-3')</b>  |
|--------------------|--------------------------|
| TaGAD2-RT-F1       | CCGGTACCGGATGCCGGAGGGG   |
| TaGAD2-RT-R1       | GATAGCAGTCTCATCCTCGCCG   |
| TaGAD2-RT-F2       | TTCTTCAGCCGGAGCTTGAA     |
| TaGAD2-RT-R2       | GTGCAATGATCTGGCTAGCACC   |
| TaActin-F          | ACCTTCAGTTGCCCAAGCAAT    |
| TaActin-R          | CAGAGTCGAGCACAATACCAGTTG |

**Table S3 Effects of *Rht5* on internodes elongation and spike length**

| Groups   | Genotypes       | I5 length | I4 length  | I3 length  | I2 length  | Peduncle length | Spike length | Plant height |
|----------|-----------------|-----------|------------|------------|------------|-----------------|--------------|--------------|
| T1 VS D1 | T1              | 5.69±2.48 | 14.38±1.87 | 17.19±1.31 | 23.62±1.04 | 24.00±0.37      | 8.71±0.60    | 93.75±6.39   |
|          | D1              | 3.9±0.91  | 9.25±1.65  | 13.62±0.94 | 17.43±1.19 | 17.04±3.40      | 7.52±0.49    | 67.87±3.65   |
|          | Effect          | -31.43%   | -35.65%    | -20.76%    | -26.22%    | -29.00%         | -13.69%      | -22.67%      |
|          | Contribute rate | 6.91%     | 19.80%     | 13.78%     | 23.94%     | 26.89%          | 4.61%        | 100.00%      |
| T2 VS D2 | T2              | 9.75±1.98 | 15.94±1.27 | 18.31±1.71 | 22.56±1.52 | 19.56±8.14      | 8.10±0.40    | 94.36±4.73   |
|          | D2              | 3.55±1.64 | 9.65±2.30  | 13.46±1.74 | 19.09±1.36 | 15.79±5.85      | 8.50±0.64    | 70.03±3.06   |
|          | Effect          | -63.59%   | -39.45%    | -26.50%    | -15.39%    | -19.28%         | 4.94%        | -23.38%      |
|          | Contribute rate | 25.48%    | 25.84%     | 19.94%     | 14.27%     | 15.50%          | -1.64%       | 100.00%      |
| T3 VS D3 | T3              | 3.07±1.21 | 10.85±1.28 | 16.93±2.52 | 20.64±3.54 | 25.71±2.46      | 7.94±0.62    | 85.46±4.60   |
|          | D3              | 2.85±1.45 | 7.81±3.16  | 12.24±1.67 | 15.72±1.59 | 14.03±5.55      | 7.86±0.49    | 60.12±1.92   |
|          | Effect          | -7.21%    | -28.07%    | -27.70%    | -23.85%    | -45.44%         | -1.04%       | -27.45%      |
|          | Contribute rate | 0.87%     | 12.03%     | 18.50%     | 19.43%     | 46.12%          | 0.33%        | 100.00%      |
| Average  | Effect          | -34.08%   | -34.39%    | -24.98%    | -21.82%    | -31.24%         | -3.26%       | -24.50%      |
|          | Contribute rate | 11.09%    | 19.22%     | 17.41%     | 19.21%     | 29.50%          | 1.10%        | 100.00%      |

Note: Data are presented as mean ± SE (standard error). Effect (%) = (Mean of dwarf lines – Mean of tall lines)/Mean of tall lines × 100%;  
Contribute rate (%) = (Tall internode length – Dwarf internode length)/(Tall plant height – Dwarf plant height) × 100%.

**Table S4. Gene Ontology (GO) enrichment analysis of the differentially expressed genes (DEGs)**

| GO accession | Term type | Term                                                         | Number | <i>P</i> -value        | FDR                    | Rich Factor |
|--------------|-----------|--------------------------------------------------------------|--------|------------------------|------------------------|-------------|
| GO:0009986   | CC        | Cell surface                                                 | 23     | $4.80 \times 10^{-07}$ | $3.20 \times 10^{-04}$ | 0.032348805 |
| GO:0010008   | CC        | Endosome membrane                                            | 27     | $1.10 \times 10^{-05}$ | $2.20 \times 10^{-03}$ | 0.024085638 |
| GO:0048471   | CC        | Perinuclear region of cytoplasm                              | 14     | $1.20 \times 10^{-05}$ | $2.20 \times 10^{-03}$ | 0.038888889 |
| GO:0044440   | CC        | Endosomal part                                               | 27     | $1.30 \times 10^{-05}$ | $2.20 \times 10^{-03}$ | 0.023893805 |
| GO:0003700   | MF        | Transcription factor activity, sequence-specific DNA binding | 119    | $7.40 \times 10^{-15}$ | $6.10 \times 10^{-12}$ | 0.01981352  |
| GO:0001071   | MF        | Nucleic acid binding transcription factor activity           | 119    | $7.50 \times 10^{-15}$ | $6.10 \times 10^{-12}$ | 0.019810221 |
| GO:0019901   | MF        | Protein kinase binding                                       | 32     | $4.30 \times 10^{-10}$ | $2.40 \times 10^{-07}$ | 0.035087719 |
| GO:0052641   | MF        | Benzoic acid glucosyltransferase activity                    | 18     | $1.50 \times 10^{-09}$ | $3.40 \times 10^{-07}$ | 0.059602649 |
| GO:0052638   | MF        | Indole-3-butyrate beta-glucosyltransferase activity          | 18     | $1.50 \times 10^{-09}$ | $3.40 \times 10^{-07}$ | 0.059602649 |
| GO:1901700   | BP        | Response to oxygen-containing compound                       | 323    | $1.50 \times 10^{-39}$ | $1.40 \times 10^{-35}$ | 0.018641427 |
| GO:0009719   | BP        | Response to endogenous stimulus                              | 294    | $4.70 \times 10^{-36}$ | $2.30 \times 10^{-32}$ | 0.018872769 |
| GO:0009696   | BP        | Salicylic acid metabolic process                             | 80     | $1.70 \times 10^{-35}$ | $5.70 \times 10^{-32}$ | 0.054570259 |
| GO:0009607   | BP        | Response to biotic stimulus                                  | 253    | $2.50 \times 10^{-34}$ | $6.10 \times 10^{-31}$ | 0.020111288 |
| GO:0010200   | BP        | Response to chitin                                           | 100    | $3.90 \times 10^{-34}$ | $7.70 \times 10^{-31}$ | 0.040749796 |

Note: Term type represents GO category (BP, biological process; MF, molecular function; CC, cellular component); *P*-values were calculated using a hypergeometric test and adjusted for multiple testing using the false discovery rate (FDR); FDR represents the multiple testing-adjusted *P*-value. Rich Factor indicates the enrichment strength of each GO term.

**Table S5. KEGG pathway enrichment of the differentially expressed genes (DEGs)**

| <b>ID</b> | <b>KEGG name</b>                      | <b>Number</b> | <b><i>P</i>-value</b>  | <b><i>Q</i>-value</b>  | <b>KEGG_class</b>                           |
|-----------|---------------------------------------|---------------|------------------------|------------------------|---------------------------------------------|
| KO04016   | MAPK signaling pathway - plant        | 24            | $5.23 \times 10^{-10}$ | $4.18 \times 10^{-08}$ | Signal transduction                         |
| KO00360   | Phenylalanine metabolism              | 14            | $3.18 \times 10^{-09}$ | $1.27 \times 10^{-07}$ | Amino acid metabolism                       |
| KO01110   | Biosynthesis of secondary metabolites | 85            | $2.42 \times 10^{-08}$ | $6.46 \times 10^{-07}$ | Global and overview maps                    |
| KO04626   | Plant-pathogen interaction            | 26            | $1.67 \times 10^{-07}$ | $3.33 \times 10^{-06}$ | Environmental adaptation                    |
| KO00940   | Phenylpropanoid biosynthesis          | 23            | $2.03 \times 10^{-05}$ | $3.25 \times 10^{-04}$ | Biosynthesis of other secondary metabolites |
| KO00591   | Linoleic acid metabolism              | 5             | $3.39 \times 10^{-04}$ | $4.51 \times 10^{-03}$ | Lipid metabolism                            |
| KO00750   | Vitamin B6 metabolism                 | 3             | $6.89 \times 10^{-03}$ | $7.29 \times 10^{-02}$ | Metabolism of cofactors and vitamins        |
| KO00592   | alpha-Linolenic acid metabolism       | 6             | $7.29 \times 10^{-03}$ | $7.29 \times 10^{-02}$ | Lipid metabolism                            |
| KO00904   | Diterpenoid biosynthesis              | 5             | $8.89 \times 10^{-03}$ | $7.90 \times 10^{-02}$ | Metabolism of terpenoids and polyketides    |
| KO00220   | Arginine biosynthesis                 | 4             | $1.41 \times 10^{-02}$ | $1.13 \times 10^{-01}$ | Amino acid metabolism                       |
| KO00944   | Flavone and flavonol biosynthesis     | 3             | $1.61 \times 10^{-02}$ | $1.17 \times 10^{-01}$ | Biosynthesis of other secondary metabolites |
| KO00910   | Nitrogen metabolism                   | 5             | $1.89 \times 10^{-02}$ | $1.26 \times 10^{-01}$ | Energy metabolism                           |
| KO01210   | 2-Oxocarboxylic acid metabolism       | 5             | $2.92 \times 10^{-02}$ | $1.63 \times 10^{-01}$ | Global and overview maps                    |
| KO00460   | Cyanoamino acid metabolism            | 7             | $3.01 \times 10^{-02}$ | $1.63 \times 10^{-01}$ | Metabolism of other amino acids             |
| KO00410   | beta-Alanine metabolism               | 4             | $3.05 \times 10^{-02}$ | $1.63 \times 10^{-01}$ | Metabolism of other amino acids             |

Note: *P*-value is the raw enrichment *P*-value, and *Q*-value is the multiple testing-adjusted *P*-value. “KEGG\_class” denotes the functional category assigned by KEGG.

**Table S6. Transcripts per million (TPM) values of phytohormone-related DEGs**

| Pathway | Gene ID                   | Gene description                                                        | TPMs   |          |        |        |        |        |        |        |        |
|---------|---------------------------|-------------------------------------------------------------------------|--------|----------|--------|--------|--------|--------|--------|--------|--------|
|         |                           |                                                                         | JM47   | Marfed M | T1     | T2     | T3     | Mean   | D1     | D2     | D3     |
| GA      | <i>TraesCS7D02G539200</i> | GA biosynthesis enzyme <i>TaCPS-D</i>                                   | 1.14   | 4.33     | 1.16   | 1.15   | 1.47   | 1.26   | 2.48   | 2.06   | 3.72   |
|         | <i>TraesCS3D02G293800</i> | Gibberellin 2-beta-dioxygenase <i>TaGA2ox-D3</i>                        | 1.28   | 3.24     | 10.05  | 14.95  | 30.75  | 18.59  | 8.24   | 6.08   | 4.50   |
|         | <i>TraesCS1D02G127000</i> | Gibberellin 2-beta-dioxygenase <i>TaGA2ox-D10</i>                       | 2.63   | 1.38     | 4.65   | 4.56   | 5.75   | 4.98   | 2.45   | 1.66   | 2.16   |
|         | <i>TraesCS3B02G141800</i> | GA biosynthesis enzyme <i>TaGA3ox-B2</i>                                | 48.13  | 3.16     | 64.89  | 28.55  | 47.62  | 47.02  | 34.96  | 50.94  | 7.73   |
|         | <i>TraesCS3D02G124500</i> | GA biosynthesis enzyme <i>TaGA3ox-D2</i>                                | 30.14  | 3.42     | 29.97  | 9.99   | 23.58  | 21.18  | 22.20  | 34.61  | 7.44   |
|         | <i>TraesCS1A02G255100</i> | Gibberellin Receptor <i>GID1-A</i>                                      | 8.56   | 10.79    | 15.14  | 42.89  | 60.43  | 39.48  | 26.77  | 31.28  | 6.97   |
|         | <i>TraesCS4A02G271000</i> | Green revolution gene <i>Rht-A1</i> (DELLA protein GRA)                 | 133.16 | 67.38    | 111.87 | 88.11  | 73.97  | 91.32  | 87.74  | 94.07  | 62.00  |
|         | <i>TraesCS4B02G043100</i> | Green revolution gene <i>Rht-B1</i>                                     | 113.77 | 67.27    | 102.42 | 76.51  | 61.13  | 80.02  | 91.76  | 96.95  | 63.60  |
|         | <i>TraesCS4D02G040400</i> | Green revolution gene <i>Rht-D1</i>                                     | 96.71  | 52.80    | 71.66  | 59.15  | 47.02  | 59.27  | 62.71  | 66.36  | 57.20  |
| BR      | <i>TraesCS6B02G334600</i> | Transcription factor <i>ILI5</i>                                        | 11.74  | 39.11    | 14.61  | 15.51  | 7.22   | 12.45  | 21.22  | 16.05  | 37.48  |
|         | <i>TraesCS6D02G285300</i> | Transcription factor <i>ILI5</i>                                        | 24.84  | 80.71    | 31.63  | 29.73  | 10.94  | 24.10  | 42.69  | 33.29  | 96.31  |
|         | <i>TraesCS4D02G282100</i> | Serine/threonine protein phosphatase <i>PP2A-4</i><br>catalytic subunit | 40.50  | 54.67    | 39.14  | 67.22  | 54.79  | 53.71  | 63.59  | 60.66  | 58.23  |
|         | <i>TraesCS4D02G221200</i> | Protein TPR3                                                            | 24.53  | 32.33    | 30.38  | 38.03  | 31.92  | 33.45  | 47.10  | 46.98  | 33.46  |
|         | <i>TraesCS3A02G055600</i> | 14-3-3-like protein B                                                   | 191.25 | 264.84   | 133.12 | 124.83 | 123.95 | 127.30 | 189.33 | 147.89 | 281.06 |
|         | <i>TraesCS4A02G268700</i> | 14-3-3-like protein A                                                   | 312.89 | 380.74   | 288.00 | 269.76 | 251.65 | 269.81 | 348.13 | 305.97 | 389.39 |
|         | <i>TraesCS4B02G045500</i> | 14-3-3-like protein A                                                   | 310.53 | 358.22   | 269.67 | 237.02 | 240.81 | 249.16 | 348.21 | 285.03 | 360.04 |
|         | <i>TraesCS4D02G046400</i> | 14-3-3-like protein A                                                   | 393.33 | 450.59   | 339.93 | 312.69 | 305.78 | 319.46 | 397.35 | 367.19 | 447.00 |
| AUX     | <i>TraesCS6B02G260800</i> | Bifunctional nitrilase/nitrile hydratase <i>NIT4</i>                    | 9.71   | 54.22    | 49.89  | 27.21  | 48.36  | 41.82  | 31.35  | 37.17  | 55.26  |
|         | <i>TraesCS6D02G215300</i> | Bifunctional nitrilase/nitrile hydratase <i>NIT4</i>                    | 25.55  | 41.66    | 26.94  | 34.14  | 35.94  | 32.34  | 27.68  | 36.91  | 40.67  |
|         | <i>TraesCS4B02G193200</i> | Pyruvate decarboxylase 2                                                | 46.85  | 6.50     | 36.90  | 42.06  | 136.54 | 71.83  | 41.37  | 124.07 | 5.65   |
|         | <i>TraesCS4D02G194200</i> | Pyruvate decarboxylase 2                                                | 54.58  | 79.68    | 68.49  | 395.26 | 288.67 | 250.81 | 112.41 | 264.59 | 103.81 |
|         | <i>TraesCS5D02G517000</i> | IAA-amino acid hydrolase ILR1-like 4                                    | 11.97  | 34.13    | 18.83  | 20.28  | 17.29  | 18.80  | 19.39  | 23.17  | 26.57  |

|     |                           |                                                             |       |       |       |       |       |       |       |       |       |
|-----|---------------------------|-------------------------------------------------------------|-------|-------|-------|-------|-------|-------|-------|-------|-------|
|     | <i>TraesCS2A02G113600</i> | Very-long-chain enoyl-CoA reductase                         | 2.81  | 1.04  | 0.09  | 0.16  | 0.10  | 0.12  | 1.59  | 0.95  | 3.10  |
|     | <i>TraesCS3A02G103800</i> | Cytochrome <i>P450 90D2</i>                                 | 2.31  | 1.93  | 7.86  | 5.40  | 11.77 | 8.34  | 2.54  | 4.21  | 0.92  |
|     | <i>TraesCS5A02G500000</i> | DIMBOA UDP-glucosyltransferase <i>BX8</i>                   | 6.22  | 29.04 | 7.12  | 6.98  | 12.05 | 8.72  | 11.11 | 8.09  | 17.71 |
|     | <i>TraesCS3B02G156600</i> | UDP-glycosyltransferase <i>76F1</i>                         | 5.88  | 9.56  | 9.51  | 12.48 | 11.45 | 11.15 | 9.87  | 9.22  | 6.85  |
| CTK | <i>TraesCS3D02G139300</i> | UDP-glycosyltransferase <i>85A7</i>                         | 4.80  | 9.53  | 9.60  | 12.67 | 11.07 | 11.11 | 9.52  | 9.09  | 7.76  |
|     | <i>TraesCS6A02G288100</i> | Transcription factor <i>BIM2</i>                            | 2.45  | 4.88  | 6.29  | 13.83 | 12.90 | 11.01 | 5.57  | 5.07  | 2.70  |
|     | <i>TraesCS6D02G270900</i> | Transcription factor <i>BIM2</i>                            | 0.96  | 3.01  | 3.08  | 5.35  | 5.33  | 4.59  | 2.33  | 2.39  | 1.95  |
|     | <i>TraesCS5D02G428400</i> | Transcription factor Phytochrome-interacting factor-like 13 | 2.28  | 2.01  | 1.80  | 4.81  | 6.66  | 4.42  | 2.33  | 2.87  | 2.58  |
|     | <i>TraesCS2B02G436300</i> | Ethylene-responsive transcription factor 2                  | 1.79  | 15.38 | 11.62 | 19.90 | 35.07 | 22.20 | 7.02  | 5.62  | 3.86  |
|     | <i>TraesCS2D02G414600</i> | Ethylene-responsive transcription factor 2                  | 0.31  | 3.86  | 2.32  | 5.29  | 14.47 | 7.36  | 1.28  | 1.16  | 0.95  |
|     | <i>TraesCS2A02G307100</i> | Mitogen-activated protein kinase kinase kinase 3            | 3.27  | 16.80 | 3.46  | 6.87  | 7.73  | 6.02  | 5.56  | 4.91  | 11.53 |
| ETH | <i>TraesCS4B02G039300</i> | Probable ethylene response sensor 1                         | 7.17  | 15.35 | 7.58  | 9.01  | 8.95  | 8.52  | 11.06 | 9.45  | 12.91 |
|     | <i>TraesCS4D02G036400</i> | Probable ethylene response sensor 1                         | 8.81  | 13.33 | 6.92  | 9.35  | 8.05  | 8.11  | 10.46 | 8.67  | 11.62 |
|     | <i>TraesCS6A02G169300</i> | S-adenosylmethionine synthase                               | 32.52 | 54.51 | 50.20 | 43.07 | 41.10 | 44.79 | 58.43 | 60.11 | 52.40 |
|     | <i>TraesCS6B02G197300</i> | S-adenosylmethionine synthase                               | 30.13 | 45.25 | 43.06 | 42.48 | 40.81 | 42.12 | 49.85 | 53.80 | 43.47 |

Note: T1, T2, T3 indicate the tall *Rht5* RILs. D1, D2 and D3 indicate three independent dwarf *Rht5* RILs. GA = Gibberellin pathway, BR = Brassinosteroid pathway, AUX = Auxin pathway, CTK = Cytokinin pathway, ETH = Ethylene pathway.

**Table S7. TPM values of DEGs involving in phytohormone pathway related to stress responses**

| Function | Gene description          | Gene ID                             | TPMs  |          |       |       |       |       |       |       |       |
|----------|---------------------------|-------------------------------------|-------|----------|-------|-------|-------|-------|-------|-------|-------|
|          |                           |                                     | JM47  | Marfed M | T1    | T2    | T3    | Mean  | D1    | D2    | D3    |
| SA       | <i>TraesCS3B02G045900</i> | Calmodulin-binding protein 60 B     | 0.29  | 22.35    | 2.29  | 15.01 | 16.38 | 11.23 | 4.38  | 2.79  | 6.00  |
|          | <i>TraesCS3D02G041800</i> | Calmodulin-binding protein 60 B     | 0.39  | 10.62    | 4.67  | 12.07 | 12.88 | 9.87  | 7.02  | 3.68  | 3.66  |
|          | <i>TraesCS4A02G216100</i> | Lipase-like <i>PAD4</i>             | 5.37  | 29.43    | 9.56  | 17.45 | 20.03 | 15.68 | 8.48  | 7.31  | 6.51  |
|          | <i>TraesCS4B02G100100</i> | Lipase-like <i>PAD4</i>             | 6.35  | 17.40    | 6.99  | 10.01 | 12.51 | 9.84  | 9.84  | 7.30  | 6.67  |
|          | <i>TraesCS4D02G096400</i> | Lipase-like <i>PAD4</i>             | 6.76  | 40.71    | 6.96  | 15.56 | 16.58 | 13.03 | 9.37  | 7.30  | 12.24 |
|          | <i>TraesCS7B02G187600</i> | NAC domain-containing protein 14    | 5.99  | 13.81    | 8.64  | 15.93 | 13.29 | 12.62 | 10.77 | 8.99  | 12.11 |
|          | <i>TraesCS3B02G371200</i> | NAC domain-containing protein 68    | 0.47  | 7.13     | 6.35  | 16.88 | 26.36 | 16.53 | 2.35  | 4.03  | 1.80  |
|          | <i>TraesCS3A02G339600</i> | NAC domain-containing protein 68    | 0.32  | 8.12     | 5.51  | 18.70 | 29.21 | 17.81 | 2.64  | 5.04  | 1.25  |
|          | <i>TraesCS3D02G333100</i> | NAC domain-containing protein 68    | 0.03  | 10.19    | 4.84  | 16.27 | 24.96 | 15.36 | 1.99  | 2.71  | 1.98  |
|          | <i>TraesCS6D02G327600</i> | Pathogenesis-related protein PR-1   | 17.95 | 6.95     | 12.46 | 2.73  | 2.51  | 5.90  | 11.90 | 15.14 | 7.91  |
|          | <i>TraesCS5A02G183300</i> | Pathogenesis-related protein PRB1-3 | 0.00  | 0.00     | 6.74  | 6.97  | 6.90  | 6.87  | 0.38  | 4.84  | 0.00  |
|          | <i>TraesCS7D02G161200</i> | Pathogenesis-related protein PRB1-3 | 0.00  | 0.00     | 10.32 | 8.57  | 8.79  | 9.23  | 0.33  | 7.29  | 0.00  |
|          | <i>TraesCS7B02G105100</i> | Pathogenesis-related protein PRMS   | 0.24  | 0.00     | 15.21 | 21.37 | 18.73 | 18.44 | 0.92  | 5.26  | 0.00  |
|          | <i>TraesCS5A02G225500</i> | WRKY transcription factor WRKY62    | 0.00  | 37.94    | 0.00  | 0.00  | 0.00  | 0.00  | 9.78  | 0.73  | 52.68 |
|          | <i>TraesCS5D02G232700</i> | WRKY transcription factor WRKY62    | 0.00  | 22.50    | 0.12  | 0.00  | 0.25  | 0.12  | 6.15  | 0.40  | 30.62 |
|          | <i>TraesCS5B02G224100</i> | WRKY transcription factor WRKY76    | 0.00  | 11.35    | 0.12  | 0.18  | 0.49  | 0.26  | 1.61  | 0.78  | 8.98  |
|          | <i>TraesCS5A02G225600</i> | WRKY transcription factor WRKY76    | 0.00  | 82.21    | 0.04  | 0.42  | 1.24  | 0.57  | 14.70 | 2.57  | 68.27 |
|          | <i>TraesCS5B02G224000</i> | WRKY transcription factor WRKY76    | 0.31  | 75.12    | 0.50  | 0.94  | 1.28  | 0.91  | 12.66 | 2.29  | 73.22 |
|          | <i>TraesCS5D02G232800</i> | WRKY transcription factor WRKY76    | 0.41  | 82.28    | 0.52  | 0.30  | 1.06  | 0.63  | 11.38 | 1.17  | 62.60 |
|          | <i>TraesCS5D02G232900</i> | WRKY transcription factor WRKY76    | 0.08  | 62.92    | 0.00  | 0.13  | 1.27  | 0.47  | 13.89 | 2.07  | 63.62 |

|     |                           |                                                |      |       |       |       |       |       |       |       |       |
|-----|---------------------------|------------------------------------------------|------|-------|-------|-------|-------|-------|-------|-------|-------|
|     | <i>TraesCS5D02G038800</i> | 9-cis-epoxycarotenoid dioxygenase <i>NCED5</i> | 0.18 | 1.69  | 0.11  | 0.26  | 0.32  | 0.23  | 0.67  | 1.23  | 1.38  |
|     | <i>TraesCS7B02G269600</i> | Abcisic acid receptor <i>PYL9</i>              | 2.65 | 1.55  | 2.52  | 4.19  | 7.94  | 4.88  | 1.15  | 2.49  | 1.21  |
| ABA | <i>TraesCS2A02G099400</i> | ABSCISIC ACID-INSENSITIVE 5-like protein 3     | 7.49 | 5.13  | 8.41  | 6.76  | 7.30  | 7.49  | 5.82  | 6.54  | 3.39  |
|     | <i>TraesCS6A02G160500</i> | Potassium channel <i>KAT1</i>                  | 4.82 | 8.35  | 7.77  | 10.69 | 10.21 | 9.55  | 10.81 | 19.07 | 9.40  |
|     | <i>TraesCS4B02G079300</i> | Serine/threonine protein kinase <i>SAPK10</i>  | 4.16 | 0.34  | 4.52  | 4.28  | 8.08  | 5.63  | 3.60  | 2.87  | 0.49  |
|     | <i>TraesCS6A02G185100</i> | Allene oxide synthase 4                        | 6.31 | 1.60  | 10.62 | 8.03  | 8.48  | 9.04  | 8.06  | 7.11  | 1.93  |
|     | <i>TraesCS3A02G145300</i> | Probable indole-3-acetic acid-amido synthetase | 3.39 | 12.14 | 3.03  | 3.74  | 4.40  | 3.72  | 5.30  | 6.71  | 8.66  |
|     | <i>TraesCS5A02G212800</i> | Protein TIFY 10c                               | 1.37 | 13.20 | 20.51 | 33.41 | 33.35 | 29.09 | 20.90 | 23.03 | 9.39  |
|     | <i>TraesCS5B02G211000</i> | Protein TIFY 10c                               | 0.00 | 4.29  | 4.75  | 11.98 | 14.98 | 10.57 | 3.17  | 2.57  | 2.70  |
| JA  | <i>TraesCS5D02G219300</i> | Protein TIFY 10c                               | 0.33 | 13.36 | 14.11 | 30.67 | 38.85 | 27.88 | 7.77  | 7.51  | 12.23 |
|     | <i>TraesCS3B02G284800</i> | Transcription factor <i>MYC2</i>               | 0.81 | 1.48  | 2.38  | 13.41 | 16.02 | 10.60 | 2.02  | 1.44  | 0.58  |
|     | <i>TraesCS3D02G253700</i> | Transcription factor <i>MYC2</i>               | 0.92 | 3.83  | 3.13  | 16.57 | 21.64 | 13.78 | 2.26  | 1.24  | 1.07  |
|     | <i>TraesCS3D02G341100</i> | WRKY DNA-binding transcription factor 70       | 0.49 | 2.54  | 6.95  | 25.02 | 31.24 | 21.07 | 3.14  | 3.68  | 0.89  |
|     | <i>TraesCS3B02G379200</i> | WRKY transcription factor <i>WRKY24</i>        | 0.31 | 2.59  | 8.58  | 26.33 | 34.99 | 23.30 | 4.52  | 3.99  | 0.95  |

Note: T1, T2, T3 indicate the tall *Rht5* RILs. D1, D2 and D3 indicate three independent dwarf *Rht5* RILs. SA = Salicylic acid pathway ABA = Abscisic acid pathway, JA = Jasmonic acid pathway

**Table S8. TPM values of plant growth- and development-associated DEGs**

| Name           | Gene ID                   | Gene description                                                       | TPMs  |          |       |       |       |       |       |       |       |
|----------------|---------------------------|------------------------------------------------------------------------|-------|----------|-------|-------|-------|-------|-------|-------|-------|
|                |                           |                                                                        | JM47  | Marfed M | T1    | T2    | T3    | Mean  | D1    | D2    | D3    |
| <i>TaSPL17</i> | <i>TraesCS7A02G246500</i> | Squamosa promoter-binding protein                                      | 2.89  | 4.72     | 1.38  | 3.35  | 1.79  | 2.17  | 3.32  | 1.80  | 4.59  |
|                | <i>TraesCS5D02G273900</i> |                                                                        | 2.46  | 1.05     | 1.95  | 2.45  | 1.89  | 2.10  | 1.49  | 1.48  | 0.90  |
| <i>TaPKs</i>   | <i>TraesCS5A02G131100</i> | Pyruvate kinase                                                        | 72.40 | 46.59    | 62.79 | 89.05 | 66.45 | 72.77 | 54.28 | 72.44 | 54.75 |
|                | <i>TraesCS5B02G131000</i> |                                                                        | 84.98 | 47.79    | 72.92 | 85.66 | 68.96 | 75.85 | 61.44 | 77.85 | 57.55 |
|                | <i>TraesCS5D02G138800</i> |                                                                        | 73.85 | 55.28    | 67.76 | 88.87 | 69.01 | 75.21 | 57.85 | 74.41 | 68.39 |
| <i>TaDEP3</i>  | <i>TraesCS7A02G464400</i> | Erect and dense spike gene;<br>glycoprotein-associated phospholipase A | 2.82  | 4.40     | 15.08 | 16.12 | 35.60 | 22.27 | 9.01  | 6.57  | 1.76  |
|                | <i>TraesCS7B02G364900</i> |                                                                        | 2.22  | 5.51     | 9.53  | 12.52 | 30.11 | 17.39 | 5.32  | 5.00  | 1.49  |
|                | <i>TraesCS7D02G452000</i> |                                                                        | 5.34  | 8.22     | 25.24 | 27.10 | 59.39 | 37.24 | 13.40 | 12.90 | 3.76  |
| <i>TaIDD14</i> | <i>TraesCS4A02G074700</i> | Zinc finger protein SHOOT                                              | 6.32  | 0.47     | 5.16  | 3.41  | 3.93  | 4.16  | 2.44  | 3.32  | 1.52  |
|                | <i>TraesCS4D02G232000</i> | GRAVITROPISM 5                                                         | 6.02  | 0.53     | 6.82  | 5.56  | 4.70  | 5.69  | 2.28  | 3.85  | 0.80  |
| <i>TaMAPK6</i> | <i>TraesCS7A02G111300</i> | Mitogen-activated protein kinase                                       | 8.36  | 26.90    | 15.24 | 11.23 | 21.35 | 15.94 | 14.42 | 18.80 | 7.76  |
|                | <i>TraesCS7B02G009200</i> |                                                                        | 31.69 | 27.94    | 27.02 | 29.93 | 27.02 | 27.99 | 33.92 | 35.37 | 34.23 |
|                | <i>TraesCS7D02G106400</i> |                                                                        | 39.40 | 31.84    | 32.37 | 34.81 | 31.79 | 32.99 | 38.91 | 40.55 | 37.07 |
| <i>TaBC2</i>   | <i>TraesCS5A02G161600</i> | Brittle culm gene                                                      | 43.21 | 54.50    | 41.57 | 45.56 | 39.32 | 42.15 | 56.45 | 55.53 | 56.06 |
|                | <i>TraesCS5B02G159100</i> |                                                                        | 35.23 | 40.19    | 36.72 | 42.24 | 32.21 | 37.06 | 44.23 | 46.47 | 41.50 |
|                | <i>TraesCS5D02G167500</i> |                                                                        | 46.95 | 44.29    | 47.57 | 45.10 | 39.89 | 44.19 | 57.53 | 58.94 | 45.81 |
|                | <i>TraesCS6D02G291700</i> |                                                                        | 52.62 | 36.98    | 37.30 | 32.80 | 28.50 | 32.87 | 39.83 | 42.46 | 32.54 |
|                | <i>TraesCS7A02G198100</i> |                                                                        | 16.20 | 19.59    | 15.03 | 17.11 | 16.19 | 16.11 | 16.86 | 18.05 | 17.78 |
|                | <i>TraesCS7B02G104500</i> |                                                                        | 17.75 | 19.86    | 15.60 | 19.38 | 17.19 | 17.39 | 19.03 | 19.68 | 19.70 |
| <i>TaUPL2</i>  | <i>TraesCS5B02G112800</i> | E3 ubiquitin ligase                                                    | 11.13 | 13.33    | 9.68  | 14.38 | 12.50 | 12.18 | 15.05 | 12.30 | 13.15 |
|                | <i>TraesCS5D02G118000</i> |                                                                        | 11.95 | 14.54    | 10.50 | 14.13 | 12.73 | 12.45 | 15.67 | 13.08 | 14.10 |

|                     |                           |                                                           |        |       |       |       |       |       |       |       |       |
|---------------------|---------------------------|-----------------------------------------------------------|--------|-------|-------|-------|-------|-------|-------|-------|-------|
| <i>TaMHZ4</i>       | <i>TraesCS3B02G039800</i> | Protein MAO HUIZ1 4, chloroplastic                        | 3.01   | 1.02  | 6.31  | 12.02 | 12.32 | 10.22 | 0.63  | 1.20  | 0.96  |
| <i>TaMADS</i><br>15 | <i>TraesCS2A02G261200</i> | MADS-box gene                                             | 28.41  | 31.15 | 28.30 | 26.91 | 27.45 | 27.55 | 38.35 | 37.00 | 27.92 |
|                     | <i>TraesCS2B02G281000</i> |                                                           | 53.67  | 63.86 | 54.44 | 62.77 | 60.96 | 59.39 | 77.24 | 74.41 | 62.98 |
|                     | <i>TraesCS2D02G262700</i> |                                                           | 27.82  | 30.60 | 29.92 | 36.93 | 32.82 | 33.22 | 39.95 | 43.06 | 37.26 |
| <i>TaWRKYs</i>      | <i>TraesCS1B02G088900</i> | WRKY transcription factor                                 | 0.03   | 9.75  | 13.29 | 45.35 | 46.35 | 34.99 | 6.72  | 6.43  | 2.83  |
|                     | <i>TraesCS1D02G072900</i> |                                                           | 0.00   | 5.89  | 13.46 | 52.40 | 44.41 | 36.76 | 7.66  | 6.79  | 1.03  |
| <i>TaGAD2</i>       | <i>TraesCS3A02G022600</i> | Glutamate decarboxylase                                   | 50.10  | 59.17 | 37.05 | 41.25 | 39.14 | 39.15 | 57.05 | 61.05 | 50.14 |
|                     | <i>TraesCS3B02G022900</i> |                                                           | 8.78   | 68.98 | 5.41  | 5.88  | 7.65  | 6.31  | 63.55 | 65.97 | 66.40 |
|                     | <i>TraesCS3D02G023900</i> |                                                           | 162.69 | 71.42 | 86.53 | 59.22 | 57.45 | 67.73 | 85.46 | 97.51 | 77.55 |
| <i>TaPSSI</i>       | <i>TraesCS3A02G021500</i> | Shortened uppermost internode;phosphatidylserine synthase | 0.92   | 0.98  | 2.68  | 2.94  | 3.42  | 3.01  | 2.64  | 1.04  | 3.76  |
|                     | <i>TraesCS3B02G024600</i> |                                                           | 0.22   | 2.01  | 0.34  | 0.10  | 0.42  | 0.29  | 1.51  | 1.50  | 2.03  |
|                     | <i>TraesCS3D02G025400</i> |                                                           | 1.71   | 2.92  | 2.59  | 2.79  | 3.30  | 2.89  | 2.03  | 1.61  | 2.18  |

Note: T1, T2, T3 indicate the tall *Rht5* RILs. D1, D2 and D3 indicate three independent dwarf *Rht5* RILs.

**Table S9. Accession numbers of the GAD homologs used for phylogenetic analysis**

| Species                     | Gene symbol    | Gene ID            |
|-----------------------------|----------------|--------------------|
| <i>Zea mays</i>             | <i>ZmGAD1</i>  | Zm00001eb081600    |
| <i>Zea mays</i>             | <i>ZmGAD2</i>  | Zm00001eb055490    |
| <i>Zea mays</i>             | <i>ZmGAD3</i>  | Zm00001eb037690    |
| <i>Zea mays</i>             | <i>ZmGAD4</i>  | Zm00001eb081550    |
| <i>Zea mays</i>             | <i>ZmGAD5</i>  | Zm00001eb399220    |
| <i>Glycine max</i>          | <i>GmGAD1</i>  | GLYMA_18G043600    |
| <i>Glycine max</i>          | <i>GmGAD2</i>  | GLYMA_16G218500    |
| <i>Glycine max</i>          | <i>GmGAD3</i>  | GLYMA_14G211100    |
| <i>Glycine max</i>          | <i>GmGAD4</i>  | GLYMA_11G213000    |
| <i>Glycine max</i>          | <i>GmGAD5</i>  | GLYMA_09G168900    |
| <i>Glycine max</i>          | <i>GmGAD6</i>  | GLYMA_08G091300    |
| <i>Glycine max</i>          | <i>GmGAD7</i>  | GLYMA_08G091400    |
| <i>Glycine max</i>          | <i>GmGAD8</i>  | GLYMA_08G091500    |
| <i>Glycine max</i>          | <i>GmGAD9</i>  | GLYMA_05G136100    |
| <i>Glycine max</i>          | <i>GmGAD10</i> | GLYMA_02G241400    |
| <i>Triticum aestivum</i> L. | <i>TaGAD1</i>  | TraesCS3B02G583600 |
| <i>Triticum aestivum</i> L. | <i>TaGAD2</i>  | TraesCS3B02G022900 |
| <i>Triticum aestivum</i> L. | <i>TaGAD3</i>  | TraesCS3A02G022600 |
| <i>Triticum aestivum</i> L. | <i>TaGAD4</i>  | TraesCS3A02G515300 |
| <i>Triticum aestivum</i> L. | <i>TaGAD5</i>  | TraesCS3D02G023900 |
| <i>Triticum aestivum</i> L. | <i>TaGAD6</i>  | TraesCS3D02G523200 |
| <i>Triticum aestivum</i> L. | <i>TaGAD7</i>  | TraesCS2A02G315300 |
| <i>Triticum aestivum</i> L. | <i>TaGAD8</i>  | TraesCS2A02G315800 |
| <i>Triticum aestivum</i> L. | <i>TaGAD9</i>  | TraesCS2B02G333700 |
| <i>Triticum aestivum</i> L. | <i>TaGAD10</i> | TraesCS2B02G334000 |
| <i>Triticum aestivum</i> L. | <i>TaGAD11</i> | TraesCS2D02G313500 |
| <i>Triticum aestivum</i> L. | <i>TaGAD12</i> | TraesCS2D02G313800 |
| <i>Triticum aestivum</i> L. | <i>TaGAD13</i> | TraesCS4A02G075600 |
| <i>Triticum aestivum</i> L. | <i>TaGAD14</i> | TraesCS4A02G262600 |
| <i>Triticum aestivum</i> L. | <i>TaGAD15</i> | TraesCS4A02G369200 |
| <i>Triticum aestivum</i> L. | <i>TaGAD16</i> | TraesCS4B02G052300 |
| <i>Triticum aestivum</i> L. | <i>TaGAD17</i> | TraesCS4B02G231400 |
| <i>Triticum aestivum</i> L. | <i>TaGAD18</i> | TraesCS4D02G052500 |
| <i>Triticum aestivum</i> L. | <i>TaGAD19</i> | TraesCS4D02G232700 |
| <i>Oryza sativa</i>         | <i>OsGAD1</i>  | Os08g0465800       |
| <i>Oryza sativa</i>         | <i>OsGAD2</i>  | Os04g0447800       |
| <i>Oryza sativa</i>         | <i>OsGAD3</i>  | Os03g0236200       |
| <i>Oryza sativa</i>         | <i>OsGAD4</i>  | Os03g0720300       |

---

|                             |               |                     |
|-----------------------------|---------------|---------------------|
| <i>Oryza sativa</i>         | <i>OsGAD5</i> | <i>Os04g0447400</i> |
| <i>Arabidopsis thaliana</i> | <i>AtGAD1</i> | <i>AT5G17330</i>    |
| <i>Arabidopsis thaliana</i> | <i>AtGAD2</i> | <i>AT1G65960</i>    |
| <i>Arabidopsis thaliana</i> | <i>AtGAD3</i> | <i>AT2G02000</i>    |
| <i>Arabidopsis thaliana</i> | <i>AtGAD4</i> | <i>AT2G02010</i>    |
| <i>Arabidopsis thaliana</i> | <i>AtGAD5</i> | <i>AT3G17760</i>    |
| <i>Arabidopsis thaliana</i> | <i>AtGAD6</i> | <i>AT3G17720</i>    |

---

Note: Ta = *Triticum aestivum* L., Gm = *Glycine max*, Os = *Oryza sativa*, Zm = *Zea mays* and At = *Arabidopsis thaliana*.
